# Supplementary material
Source: publisher figshare collection journal article supplement (https://frontiersin.figshare.com/ndownloader/files/15261020)

## **Supplementary Material**

### **Scene regularity interacts with individual biases to modulate perceptual stability**

Qinglin Li<sup>1,2,3,6,▲,\*</sup>, Andrew Isaac Meso<sup>4,▲</sup>, Nikos K. Logothetis<sup>1,5</sup> and Georgios A. Keliris<sup>1,3,6,\*</sup>

1. Department of Physiology of Cognitive Processes, Max Planck Institute for Biological Cybernetics, Tuebingen, Germany

2. IMPRS for Cognitive and Systems Neuroscience, University Tuebingen, Germany

3. Bernstein Center for Computational Neuroscience, Tuebingen, Germany

4. Psychology and Interdisciplinary Neurosciences Research Group, Faculty of Science and Technology, Bournemouth University, UK

5. Division of Imaging Science and Biomedical Engineering, University of Manchester, Manchester M13 9PT, United Kingdom

6. Department of Biomedical Sciences, University of Antwerp, 2610 Wilrijk, Belgium

▲ Equal contribution

\* CORRESPONDENCE:

Prof. Dr. Georgios A. Keliris

[georgios.keliris@uantwerpen.be](mailto:georgios.keliris@uantwerpen.be)

or

Dr. Qinglin Li

[qinglin.li@tuebingen.mpg.de](mailto:qinglin.li@tuebingen.mpg.de)

## Supplementary Figures

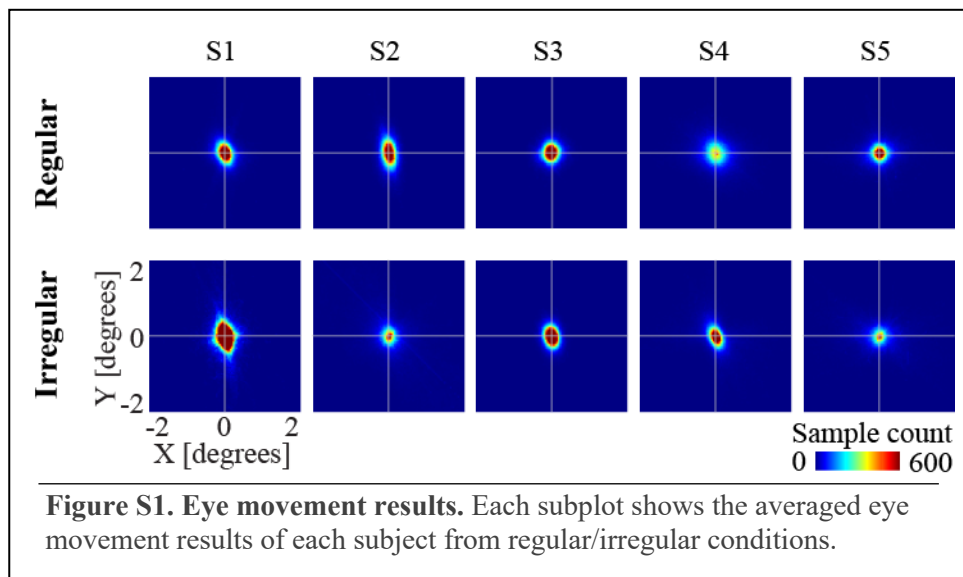

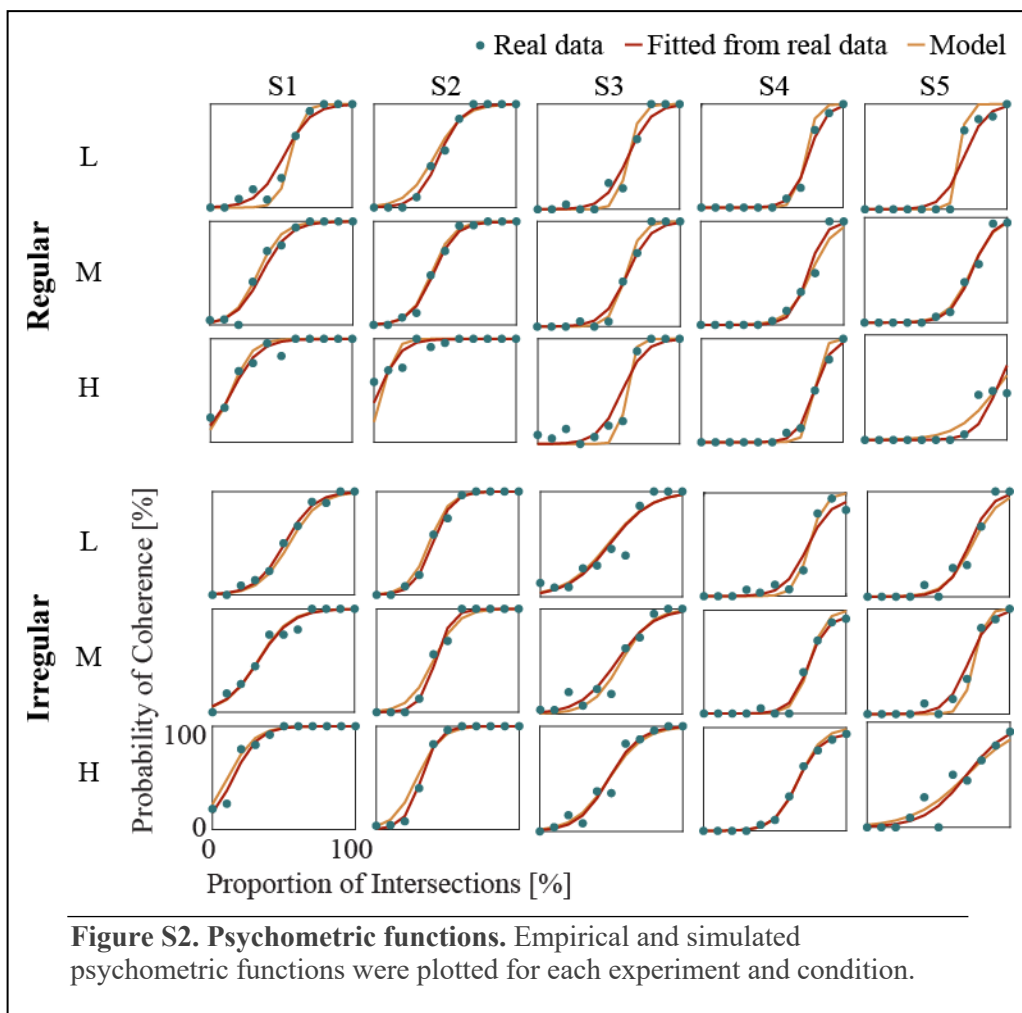

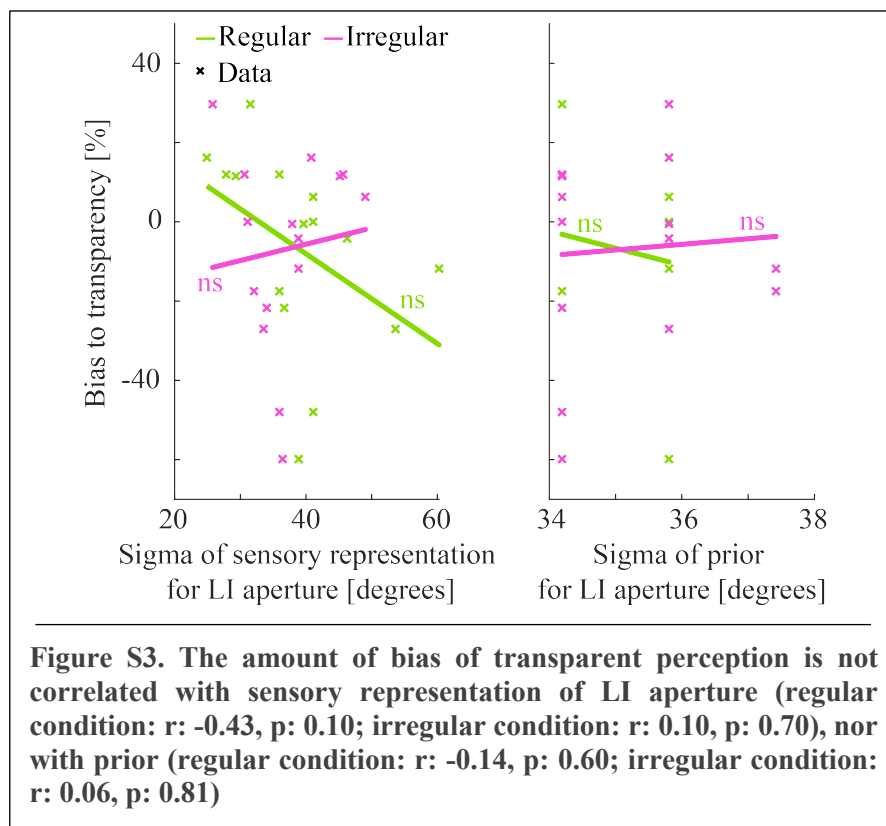

Supplement: Supplementary file [file 15261020]
